# Supplementary material for: Which Group Dynamics Matter: Social Predictors of Student Achievement in Team-Based Undergraduate Science Classrooms
Source: Atypon-hosted journal article supplement (doi:10.1187/cbe.21-06-0164), 2022-08-22
Supplement: combinedsupmats.pdf [file combinedsupmats.pdf]

# Supplemental Material

*CBE—Life Sciences Education*

Premo *et al.*

### Overview of Survey Data Collected

All survey data was collected via the online CATME platform that can be found at [www.catme.org](http://www.catme.org) . It should be noted that while all of the items were in the CATME platform they came from a variety of peer reviewed articles. Thus we have provided individual citations for sources for different sections of the overall survey where appropriate.

Evaluations of Peer Teamwork Behavior/ CIKEH (completed for each group member, Ohland et al., 2012; descriptions of ratings can also be seen at [www.catme.org](http://www.catme.org)) (Cronbach's alpha = .89)

C = contributing to the team's work (single rating)

| Rating | Description of Rating                                                                                                                                                                                                                                                                          |
|--------|------------------------------------------------------------------------------------------------------------------------------------------------------------------------------------------------------------------------------------------------------------------------------------------------|
| 5      | <ul style="list-style-type: none"> <li>- Does more or higher-quality work than expected.</li> <li>- Makes important contributions that improve the team's work.</li> <li>- Helps teammates who are having difficulty completing their work</li> </ul>                                          |
| 4      | - Demonstrates behaviors described immediately above and below.                                                                                                                                                                                                                                |
| 3      | <ul style="list-style-type: none"> <li>- Completes a fair share of the team's work with acceptable quality.</li> <li>- Keeps commitments and completes assignments on time.</li> <li>- Helps teammates who are having difficulty when it is easy or important.</li> </ul>                      |
| 2      | - Demonstrates behaviors described immediately above and below.                                                                                                                                                                                                                                |
| 1      | <ul style="list-style-type: none"> <li>- Does not do a fair share of the team's work. Delivers sloppy or incomplete work.</li> <li>- Misses deadlines. Is late, unprepared, or absent for team meetings.</li> <li>- Does not assist teammates. Quits if the work becomes difficult.</li> </ul> |

I = interacting with teammates (single rating)

| Rating | Description of Rating                                                                                                                                                                                                                                                                                                                                         |
|--------|---------------------------------------------------------------------------------------------------------------------------------------------------------------------------------------------------------------------------------------------------------------------------------------------------------------------------------------------------------------|
| 5      | <ul style="list-style-type: none"> <li>- Asks for and shows an interest in teammates' ideas and contributions.</li> <li>- Makes sure teammates stay informed and understand each other.</li> <li>- Provides encouragement or enthusiasm to the team.</li> <li>- Asks teammates for feedback and uses their suggestions to improve.</li> </ul>                 |
| 4      | - Demonstrates behaviors described immediately above and below.                                                                                                                                                                                                                                                                                               |
| 3      | <ul style="list-style-type: none"> <li>- Listens to teammates and respects their contributions.</li> <li>- Communicates clearly. Shares information with teammates.</li> <li>- Participates fully in team activities.</li> <li>- Respects and responds to feedback from teammates</li> </ul>                                                                  |
| 2      | - Demonstrates behaviors described immediately above and below.                                                                                                                                                                                                                                                                                               |
| 1      | <ul style="list-style-type: none"> <li>- Interrupts, ignores, bosses, or makes fun of teammates.</li> <li>- Takes actions that affect teammates without their input. Does not share information.</li> <li>- Complains, makes excuses, or does not interact with teammates.</li> <li>- Is defensive. Will not accept help or advice from teammates.</li> </ul> |

K = keeping the team on track (single rating)

| Rating | Description of Rating                                                                                                                                                                                                                                                            |
|--------|----------------------------------------------------------------------------------------------------------------------------------------------------------------------------------------------------------------------------------------------------------------------------------|
| 5      | <ul style="list-style-type: none"> <li>- Watches conditions affecting the team and monitors the team's progress.</li> <li>- Makes sure that teammates are making appropriate progress.</li> <li>- Gives teammates specific, timely, and constructive feedback</li> </ul>         |
| 4      | - Demonstrates behaviors described immediately above and below.                                                                                                                                                                                                                  |
| 3      | <ul style="list-style-type: none"> <li>- Notices changes that influence the team's success.</li> <li>- Knows what everyone on the team should be doing and notices problems.</li> <li>- Alerts teammates or suggests solutions when the team's success is threatened.</li> </ul> |
| 2      | - Demonstrates behaviors described immediately above and below.                                                                                                                                                                                                                  |
| 1      | <ul style="list-style-type: none"> <li>- Is unaware of whether the team is meeting its goals.</li> <li>- Does not pay attention to teammates' progress.</li> <li>- Avoids discussing team problems, even when they are obvious.</li> </ul>                                       |

E = expecting quality (single rating)

| Rating | Description of Rating                                                                                                                                                                                                                                                      |
|--------|----------------------------------------------------------------------------------------------------------------------------------------------------------------------------------------------------------------------------------------------------------------------------|
| 5      | <ul style="list-style-type: none"> <li>- Motivates the team to do excellent work.</li> <li>- Cares that the team does outstanding work, even if there is no additional reward.</li> <li>- Believes that the team can do excellent work.</li> </ul>                         |
| 4      | - Demonstrates behaviors described immediately above and below.                                                                                                                                                                                                            |
| 3      | <ul style="list-style-type: none"> <li>- Encourages the team to do good work that meets all requirements.</li> <li>- Wants the team to perform well enough to earn all available rewards.</li> <li>- Believes that the team can fully meet its responsibilities</li> </ul> |
| 2      | - Demonstrates behaviors described immediately above and below.                                                                                                                                                                                                            |
| 1      | <ul style="list-style-type: none"> <li>- Satisfied even if the team does not meet assigned standards.</li> <li>- Wants the team to avoid work, even if it hurts the team.</li> <li>- Doubts that the team can meet its requirements</li> </ul>                             |

H = having relevant knowledge, skills, and abilities (single rating)

| Rating | Description of Rating                                                                                                                                                                                                                                                                                    |
|--------|----------------------------------------------------------------------------------------------------------------------------------------------------------------------------------------------------------------------------------------------------------------------------------------------------------|
| 5      | <ul style="list-style-type: none"> <li>- Demonstrates the knowledge, skills, and abilities to do excellent work.</li> <li>- Acquires new knowledge or skills to improve the team's performance.</li> <li>- Able to perform the role of any team member if necessary</li> </ul>                           |
| 4      | - Demonstrates behaviors described immediately above and below.                                                                                                                                                                                                                                          |
| 3      | <ul style="list-style-type: none"> <li>- Demonstrates sufficient knowledge, skills, and abilities to contribute to the team's work.</li> <li>- Acquires knowledge or skills as needed to meet requirements.</li> <li>- Able to perform some of the tasks normally done by other team members.</li> </ul> |
| 2      | - Demonstrates behaviors described immediately above and below.                                                                                                                                                                                                                                          |

|   |                                                                                                                                                                                                                                                                                    |
|---|------------------------------------------------------------------------------------------------------------------------------------------------------------------------------------------------------------------------------------------------------------------------------------|
| 1 | <ul style="list-style-type: none"> <li>- Missing basic qualifications needed to be a member of the team.</li> <li>- Unable or unwilling to develop knowledge or skills to contribute to the team.</li> <li>- Unable to perform any of the duties of other team members.</li> </ul> |
|---|------------------------------------------------------------------------------------------------------------------------------------------------------------------------------------------------------------------------------------------------------------------------------------|

Disposition Toward Team Members (each student completed these in reference to each of their team members, Ohland et al., 2012)

Items were responded to using 5 Likert anchors (1 = “strongly disagree”, 2 = “disagree”, 3 = “neither agree nor disagree”, 4 = “agree”, 5 = “strongly agree”) (Cronbach’s Alpha = .83)

Willing to work with them in the future (three ratings)

- I would gladly work with this individual in the future
- If I were selecting members for a future work team, I would pick this person
- I would avoid working with this person in the future [scale reversed]

Personal connection (three ratings)

- I like this person as an individual
- I consider this person to be a friend
- I enjoy spending time with this person

General Team Ratings (not specific to a group member)

Items were responded to using 5 Likert anchors (1 = “strongly disagree”, 2 = “disagree”, 3 = “neither agree nor disagree”, 4 = “agree”, 5 = “strongly agree”)

Conflict (Jehn & Mannix, 2001)

Relationship conflict (three items)

- How much relationship tension is there in your work group?
- How often do people get angry while working in your group?
- How much emotional conflict is there in your work group?

Process conflict (three items)

- How often are there disagreements about who should do what in your work group?
- How much conflict is there in your group about task responsibilities?
- How often do you disagree about resource allocation in your work group?

Task conflict (three items)

- How much conflict of ideas is there in your work group?
- How frequently do you have disagreements within your work group about the task of the project you are working on?
- How often do people in your work group have conflicting opinions about the project you are working on?

Team Interdependence (Van der Vegt, Emans, & Van De Vliert, 2001) (five items)

- My teammates and I have to obtain information and advice from one another in order to complete our work

- I depend on my teammates for the completion of my work
- I have a one-person job; I rarely have to check or work with others [scale reversed]
- I have to work closely with my teammates to do my work properly
- In order to complete our work, my teammates and I have to collaborate extensively

Interpersonal Cohesiveness (Loughry & Tosi, 2008) (three items)

- Team members like each other
- Team members get along well
- Team members enjoy spending time together

Team Commitment (Carless & De Paola, 2000) (three items)

- Our team is united in trying to reach its goals for performance
- I'm unhappy with my team's level of commitment to the task (Task Commitment) [scale reversed]
- Our team members have conflicting aspirations for the team's performance (Task Commitment) [scale reversed]

Team Attraction (Loughry & Tosi, 2008) (three items)

- Being part of the team allows team members to do enjoyable work
- Team members get to participate in enjoyable activities
- Team members like the work that the group does

## References

- Carless, S. A., & De Paola, C. (2000). The measurement of cohesion in work teams. *Small group research*, 31(1), 71-88.
- Jehn, K. A., & Mannix, E. A. (2001). The dynamic nature of conflict: A longitudinal study of intragroup conflict and group performance. *Academy of management journal*, 44(2), 238-251.
- Loughry, M. L., & Tosi, H. (2008). Performance implications of peer monitoring. *Organization Science*, 19, 876-890
- Ohland, M. W., Loughry, M. L., Woehr, D. J., Finelli, C. J., Bullard, L. G., Felder, R. M., . . . Schmucker, D. G. (2012). The comprehensive assessment of team member effectiveness: Development of a behaviorally anchored rating scale for self- and peer evaluation. *Academy of Management Learning & Education*, 11, 609-630.
- Van der Vegt, G. S., Emans, B. J., & Van De Vliert, E. (2001). Patterns of interdependence in work teams: a two-level investigation of the relations with job and team satisfaction. *Personnel Psychology*, 54(1), 51-69.

### Instructional materials used in the courses

Biology- **Groupwork (including following activities) accounted for 10% of their grade plus 30% of their final exam grade.**

Trout, L. (Ed.). (2012). *POGIL activities for high school biology*. Flinn Scientific.

Trout, L. (Ed.). (2012). *POGIL activities for AP biology*. Flinn Scientific.

The lesson development in the resources above were funded by a grant from the Toyota USA foundation and were written and beta tested by experienced POGIL high teachers.

Chemistry- **Groupwork (including following activities) accounted for 10% of their grade but did not factor into their final exam grade.**

The original activities are currently copyrighted by Wiley, but were largely generated and disseminated on National Science Foundation grants DUE-0231120 ([https://www.nsf.gov/awardsearch/showAward?AWD\\_ID=0231120](https://www.nsf.gov/awardsearch/showAward?AWD_ID=0231120)), 0618746 ([https://www.nsf.gov/awardsearch/showAward?AWD\\_ID=0618746](https://www.nsf.gov/awardsearch/showAward?AWD_ID=0618746)), 0618758 ([https://www.nsf.gov/awardsearch/showAward?AWD\\_ID=0618758](https://www.nsf.gov/awardsearch/showAward?AWD_ID=0618758)), and 0618800 ([https://www.nsf.gov/awardsearch/showAward?AWD\\_ID=0618800](https://www.nsf.gov/awardsearch/showAward?AWD_ID=0618800)). These were modified by the course instructor to increase student's experience in data interpretation.

### Initial overall model used to predict course achievement prior to reduction via AIC validation

Course grade point average (GPA) ~ Women + Traditionally underserved student status + Teammates' views of their contributions (initial) + Teammates' views of their interactions with the team (initial) + Teammates' views if their efforts towards keeping the team on task (initial) + Teammates' views of the extent to which the student expected quality work (initial) + Teammates' views if their relevant knowledge, skills, and abilities (initial) + Teammate's willingness to work with the student (initial) + Teammates' social connection to student (initial) + Team relationship conflict (initial) + Team process conflict (initial) + Team task conflict (initial) + Team interdependence (initial) + Team interpersonal cohesiveness (initial) + Team task commitment (initial) + Team task attraction (initial) + Teammates' views of their contributions (final) + Teammates' views of their interactions with the team (final) + Teammates' views if their efforts towards keeping the team on task (final) + Teammates' views of the extent to which the student expected quality work (final) + Teammates' views if their relevant knowledge, skills, and abilities (final) + Teammates' willingness to work with the student (final) + Teammates' social connection to student (final) + Team relationship conflict (final) + Team process conflict (final) + Team task conflict (final) + Team interdependence (final) + Team interpersonal cohesiveness (final) + Team task commitment (final) + Team task attraction (final)
